# Supplementary material for: Improvement in the Identification Technology for Asian Spongy Moth, Lymantria dispar Linnaeus, 1758 (Lepidoptera: Erebidae) Based on SS-COI
Source: MDPI journal article supplement (doi:10.3390/insects14010094), 2023-01-16
Supplement: s1 [file s1]

## Supplementary Material

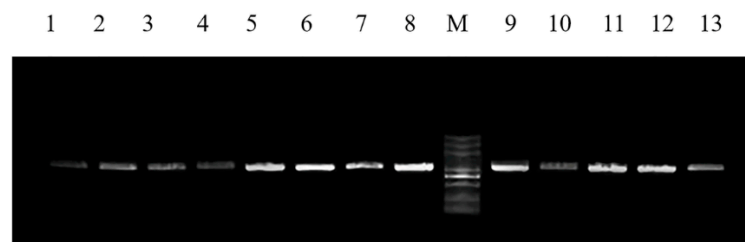

**Figure S1** Agarose gel electrophoresis of PCR products amplified from DNA extracted from four species. M: DNA marker; Lanes1–2: *Lymantria apicebrunnea*; Lanes3–5: *Lymantria monacha*; Lanes 6–8: *Lymantria xyli*; and Lanes 9–13: Asian spongy moth.

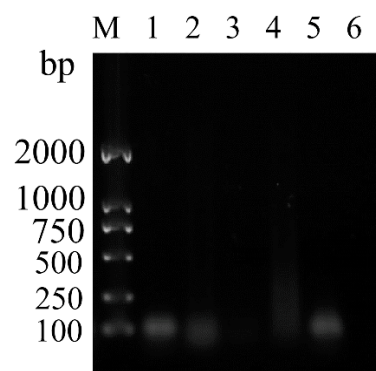

**Figure S2** Agarose gel electrophoresis of the unsuitable annealing temperature for ASMF/ASMR. M: DL2000 DNA marker; Lanes 1–6 indicate the following annealing temperatures: 48°C, 47°C, 57°C, 58°C, 59°C, and 60°C, respectively.
